# Supplementary material
Source: HighWire-hosted journal article supplement (http://www.cmaj.ca/highwire/filestream/71565/field_highwire_adjunct_files/0/180198_pain_first_nations_online.pdf)
Supplement: 180198_pain_first_nations_online.pdf [file 180198_pain_first_nations_online.pdf]

# PAIN DIAGNOSES IN FIRST NATIONS CHILDREN

## A VISUAL RESEARCH ABSTRACT

### STUDY POPULATION

2631 First Nations youth born between 1997 and 2015 compared with 2631 non-First Nations youth matched by age and sex.

### OBJECTIVE

Comparison of rates of painful conditions, mental health diagnoses and specialist referrals in First Nations and non-First Nations children.

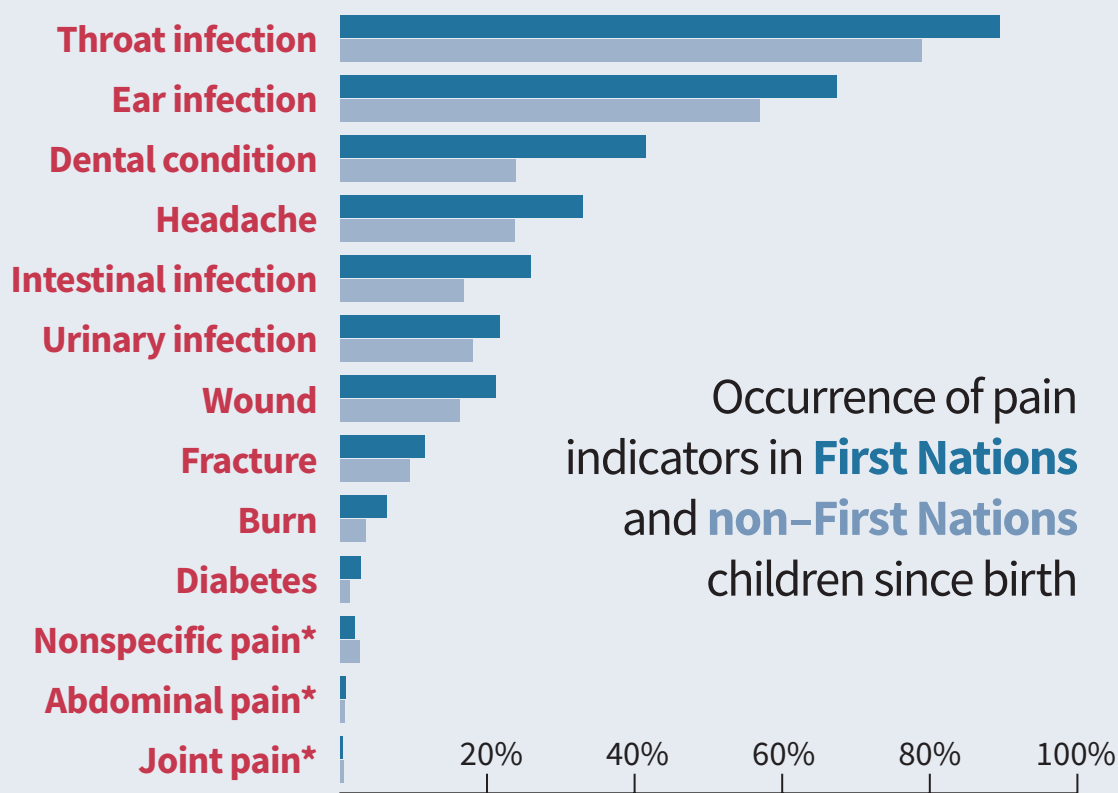

\* not statistically significant

### More likely in First Nations

- ▲ Higher rate of overall pain indicators
- ▲ NICU admission
- ▲ Visit with specialist for dental condition and headache

### Less likely in First Nations

- ▼ Mental health diagnoses
- ▼ Visit with specialist for ear and throat

**First Nations children and youth need better access to services for pain and mental health assessment, management and follow-up.**

Source: Latimer M, Rudderham S, Lethbridge L, et al. Occurrence of and referral to specialists for pain-related diagnoses in First Nations and non-First Nations children and youth. *CMAJ* 2018;190:E1434-40.

©2018 Joule Inc. or its licensors

**cma**  
**aj**
